# Supplementary material for: Evaluation of a Health Information Technology–Enabled Collective Intelligence Platform to Improve Diagnosis in Primary Care and Urgent Care Settings: Protocol for a Pragmatic Randomized Controlled Trial
Source: PubMed Central journal article supplement (PMC6701158; doi:10.2196/13151), 2019-08-06
Supplement: resprot_v8i8e13151_app1.pdf [file resprot_v8i8e13151_app1.pdf]

# Appendix 1: Post-visit questionnaire

---

Start of Block: Default Question Block

**Please do not review Human Dx output until prompted.**

-----

Name

\_\_\_\_\_

-----

Date of clinic

\_\_\_\_\_

-----

Human Dx one-liner for this case

\_\_\_\_\_  
\_\_\_\_\_  
\_\_\_\_\_  
\_\_\_\_\_  
\_\_\_\_\_

-----

1. Please indicate your level of agreement with this statement:

*The Human Dx one-liner accurately captures my clinical thinking for this case:*

- Strongly disagree
- Disagree
- Neither agree nor disagree
- Agree
- Strongly agree

---

1a. Comment on answer above

---

---

---

---

---

---

2. Would you have entered this case into Human Dx?

Human Dx is an online platform in which users can attempt to resolve clinical uncertainty by submitting cases for other physicians from around the world can comment and provide feedback on diagnostic assessment.

- Yes
- No

3. What three diagnoses are you considering for this case?

Top Diagnosis \_\_\_\_\_

2nd Diagnosis \_\_\_\_\_

3rd Diagnosis \_\_\_\_\_

3a. Provide a description of diagnostic or treatment plan if desired (optional)

---

---

---

---

---

4. How difficult would you consider this clinical case?

Not at all difficult

Somewhat difficult

Moderately difficult

Very difficult

5. How uncertain do you feel about your diagnosis for this case?

- Not at all uncertain
  - Somewhat uncertain
  - Moderately uncertain
  - Very uncertain
- 

*Display This Question:*

*If 5. How uncertain do you feel about your diagnosis for this case? != Not at all uncertain*

6. For how long have you had diagnostic or treatment uncertainty for this case? (Please select one)

- This is a new issue
  - Uncertainty for 3-6 months
  - Uncertainty for 6-12 months
  - More than 12 months
- 

7. Were you given a Human Dx URL for this case?

- Yes
  - No
- 

*Display This Question:*

*If 7. Were you given a Human Dx URL for this case? = No*

8a. How confident do you feel about your diagnosis for this patient?

- Not at all confident
- Somewhat confident
- Moderately confident
- Very confident

---

*Display This Question:*

*If 7. Were you given a Human Dx URL for this case? = Yes*

Please review Human Dx output now.

8b. How confident do you feel about your diagnosis for this patient?

- Not at all confident
- Somewhat confident
- Moderately confident
- Very confident

---

*Display This Question:*

*If 7. Were you given a Human Dx URL for this case? = Yes*

9. After looking at the output, what three diagnoses are you considering for this case?

- Top Diagnosis \_\_\_\_\_
- 2nd Diagnosis \_\_\_\_\_
- 3rd Diagnosis \_\_\_\_\_

---

*Display This Question:*

*If 7. Were you given a Human Dx URL for this case? = Yes*

10. Has your treatment plan changed?

Yes

No

---

*Display This Question:*

*If 7. Were you given a Human Dx URL for this case? = Yes*

11. Has the collective opinion influenced your decision making for diagnostic work-up?

Yes

No

---

*Display This Question:*

*If 10. Has your treatment plan changed? = Yes*

*Or 11. Has the collective opinion influenced your decision making for diagnostic work-up? = Yes*

11a. Please elaborate on changes made in one sentence

---

---

*Display This Question:*

*If 7. Were you given a Human Dx URL for this case? = Yes*

12. How helpful did you find the collective opinion?

Not at all helpful

Somewhat helpful

Moderately helpful

Very helpful

*Display This Question:*

*If 7. Were you given a Human Dx URL for this case? = Yes*

13. Was this output delivered with enough time to influence patient care?

- Yes - I received this with enough time to influence me
- Yes - but I wanted it sooner
- No - I needed it sooner
- No - I would not be influenced regardless

**End of Block: Default Question Block**

---
