# Supplementary material for: Evaluation of a Health Information Technology–Enabled Collective Intelligence Platform to Improve Diagnosis in Primary Care and Urgent Care Settings: Protocol for a Pragmatic Randomized Controlled Trial
Source: PubMed Central journal article supplement (PMC6701158; doi:10.2196/13151), 2019-08-06
Supplement: resprot_v8i8e13151_app2.pdf [file resprot_v8i8e13151_app2.pdf]

# Appendix 2: Exit Survey

Name: \_\_\_\_\_

## 1. Demographic Information:

|                                                            |                                                                                                                                                   |                                                                                                                                        |
|------------------------------------------------------------|---------------------------------------------------------------------------------------------------------------------------------------------------|----------------------------------------------------------------------------------------------------------------------------------------|
| What is your age range?                                    | <input type="checkbox"/> 20-29<br><input type="checkbox"/> 30-39<br><input type="checkbox"/> 40-49                                                | <input type="checkbox"/> 50-59<br><input type="checkbox"/> 60 and Over                                                                 |
| Are you of Hispanic, Latino/a, or Spanish origin?          | <input type="checkbox"/> Yes                                                                                                                      | <input type="checkbox"/> No                                                                                                            |
| What is your racial background?<br>(Select all that apply) | <input type="checkbox"/> American Indian or Alaska Native<br><input type="checkbox"/> Asian<br><input type="checkbox"/> Black or African American | <input type="checkbox"/> Native Hawaiian or Other Pacific Islander<br><input type="checkbox"/> White<br><input type="checkbox"/> Other |
| What is your gender?                                       | <input type="checkbox"/> Female<br><input type="checkbox"/> Male<br><input type="checkbox"/> Transfemale                                          | <input type="checkbox"/> Transmale<br><input type="checkbox"/> Other                                                                   |

|                                                         |  |
|---------------------------------------------------------|--|
| <b>2. For how many years have you been in practice?</b> |  |
|---------------------------------------------------------|--|

|                                            |                                                                                                                                         |                                                                                               |
|--------------------------------------------|-----------------------------------------------------------------------------------------------------------------------------------------|-----------------------------------------------------------------------------------------------|
| <b>3. Indicate your training/specialty</b> | <input type="checkbox"/> MD – Internal Medicine<br><input type="checkbox"/> MD – Family Medicine<br><input type="checkbox"/> MD – other | <input type="checkbox"/> Physician's Assistant<br><input type="checkbox"/> Nurse Practitioner |
|--------------------------------------------|-----------------------------------------------------------------------------------------------------------------------------------------|-----------------------------------------------------------------------------------------------|

4. Considering your complete experience, how likely would you be to recommend Human Dx to a colleague or friend?

- 0    1    2    3    4    5    6    7    8    9    10

**5. Please answer the following questions**

Attitude

|                                                                                                                                                                                                                                                                                                                                                                                                                        |                                                                                                                                                                                                                                                                                                                                                                                                                     |
|------------------------------------------------------------------------------------------------------------------------------------------------------------------------------------------------------------------------------------------------------------------------------------------------------------------------------------------------------------------------------------------------------------------------|---------------------------------------------------------------------------------------------------------------------------------------------------------------------------------------------------------------------------------------------------------------------------------------------------------------------------------------------------------------------------------------------------------------------|
| <p>Using collective intelligence technology in patient care and management is a good idea</p> <p><input type="radio"/> Strongly agree</p> <p><input type="radio"/> Agree</p> <p><input type="radio"/> Somewhat agree</p> <p><input type="radio"/> Neither agree nor disagree</p> <p><input type="radio"/> Somewhat disagree</p> <p><input type="radio"/> Disagree</p> <p><input type="radio"/> Strongly disagree</p>   | <p>Using collective intelligence technology in patient care and management is unpleasant</p> <p><input type="radio"/> Strongly agree</p> <p><input type="radio"/> Agree</p> <p><input type="radio"/> Somewhat agree</p> <p><input type="radio"/> Neither agree nor disagree</p> <p><input type="radio"/> Somewhat disagree</p> <p><input type="radio"/> Disagree</p> <p><input type="radio"/> Strongly disagree</p> |
| <p>Using collective intelligence technology is beneficial to my patient care and management</p> <p><input type="radio"/> Strongly agree</p> <p><input type="radio"/> Agree</p> <p><input type="radio"/> Somewhat agree</p> <p><input type="radio"/> Neither agree nor disagree</p> <p><input type="radio"/> Somewhat disagree</p> <p><input type="radio"/> Disagree</p> <p><input type="radio"/> Strongly disagree</p> |                                                                                                                                                                                                                                                                                                                                                                                                                     |

Perceived usefulness

|                                                                                                                                                                                                                                                                                                                                                                                                                      |                                                                                                                                                                                                                                                                                                                                                                                                                                       |
|----------------------------------------------------------------------------------------------------------------------------------------------------------------------------------------------------------------------------------------------------------------------------------------------------------------------------------------------------------------------------------------------------------------------|---------------------------------------------------------------------------------------------------------------------------------------------------------------------------------------------------------------------------------------------------------------------------------------------------------------------------------------------------------------------------------------------------------------------------------------|
| <p>Using collective intelligence technology cannot improve my patient care and management</p> <p><input type="radio"/> Strongly agree</p> <p><input type="radio"/> Agree</p> <p><input type="radio"/> Somewhat agree</p> <p><input type="radio"/> Neither agree nor disagree</p> <p><input type="radio"/> Somewhat disagree</p> <p><input type="radio"/> Disagree</p> <p><input type="radio"/> Strongly disagree</p> | <p>Using collective intelligence technology cannot enhance my effectiveness in patient care and management</p> <p><input type="radio"/> Strongly agree</p> <p><input type="radio"/> Agree</p> <p><input type="radio"/> Somewhat agree</p> <p><input type="radio"/> Neither agree nor disagree</p> <p><input type="radio"/> Somewhat disagree</p> <p><input type="radio"/> Disagree</p> <p><input type="radio"/> Strongly disagree</p> |
|----------------------------------------------------------------------------------------------------------------------------------------------------------------------------------------------------------------------------------------------------------------------------------------------------------------------------------------------------------------------------------------------------------------------|---------------------------------------------------------------------------------------------------------------------------------------------------------------------------------------------------------------------------------------------------------------------------------------------------------------------------------------------------------------------------------------------------------------------------------------|

|                                                                                                                                                                                                                                                                                                                                                                                                                       |                                                                                                                                                                                                                                                                                                                                                                                                                             |
|-----------------------------------------------------------------------------------------------------------------------------------------------------------------------------------------------------------------------------------------------------------------------------------------------------------------------------------------------------------------------------------------------------------------------|-----------------------------------------------------------------------------------------------------------------------------------------------------------------------------------------------------------------------------------------------------------------------------------------------------------------------------------------------------------------------------------------------------------------------------|
| <p>Using collective intelligence technology can make my patient care and management easier</p> <p><input type="radio"/> Strongly agree</p> <p><input type="radio"/> Agree</p> <p><input type="radio"/> Somewhat agree</p> <p><input type="radio"/> Neither agree nor disagree</p> <p><input type="radio"/> Somewhat disagree</p> <p><input type="radio"/> Disagree</p> <p><input type="radio"/> Strongly disagree</p> | <p>I would find collective intelligence technology not useful for my patient care and management</p> <p><input type="radio"/> Strongly agree</p> <p><input type="radio"/> Agree</p> <p><input type="radio"/> Somewhat agree</p> <p><input type="radio"/> Neither agree nor disagree</p> <p><input type="radio"/> Somewhat disagree</p> <p><input type="radio"/> Disagree</p> <p><input type="radio"/> Strongly disagree</p> |
|-----------------------------------------------------------------------------------------------------------------------------------------------------------------------------------------------------------------------------------------------------------------------------------------------------------------------------------------------------------------------------------------------------------------------|-----------------------------------------------------------------------------------------------------------------------------------------------------------------------------------------------------------------------------------------------------------------------------------------------------------------------------------------------------------------------------------------------------------------------------|

Perceived ease of use

|                                                                                                                                                                                                                                                                                                                                                                                                                       |                                                                                                                                                                                                                                                                                                                                                                                                                                       |
|-----------------------------------------------------------------------------------------------------------------------------------------------------------------------------------------------------------------------------------------------------------------------------------------------------------------------------------------------------------------------------------------------------------------------|---------------------------------------------------------------------------------------------------------------------------------------------------------------------------------------------------------------------------------------------------------------------------------------------------------------------------------------------------------------------------------------------------------------------------------------|
| <p>Learning to operate collective intelligence technology would not be easy for me</p> <p><input type="radio"/> Strongly agree</p> <p><input type="radio"/> Agree</p> <p><input type="radio"/> Somewhat agree</p> <p><input type="radio"/> Neither agree nor disagree</p> <p><input type="radio"/> Somewhat disagree</p> <p><input type="radio"/> Disagree</p> <p><input type="radio"/> Strongly disagree</p>         | <p>Using collective intelligence technology cannot enhance my effectiveness in patient care and management</p> <p><input type="radio"/> Strongly agree</p> <p><input type="radio"/> Agree</p> <p><input type="radio"/> Somewhat agree</p> <p><input type="radio"/> Neither agree nor disagree</p> <p><input type="radio"/> Somewhat disagree</p> <p><input type="radio"/> Disagree</p> <p><input type="radio"/> Strongly disagree</p> |
| <p>Using collective intelligence technology can make my patient care and management easier</p> <p><input type="radio"/> Strongly agree</p> <p><input type="radio"/> Agree</p> <p><input type="radio"/> Somewhat agree</p> <p><input type="radio"/> Neither agree nor disagree</p> <p><input type="radio"/> Somewhat disagree</p> <p><input type="radio"/> Disagree</p> <p><input type="radio"/> Strongly disagree</p> | <p>I would find collective intelligence technology not useful for my patient care and management</p> <p><input type="radio"/> Strongly agree</p> <p><input type="radio"/> Agree</p> <p><input type="radio"/> Somewhat agree</p> <p><input type="radio"/> Neither agree nor disagree</p> <p><input type="radio"/> Somewhat disagree</p> <p><input type="radio"/> Disagree</p> <p><input type="radio"/> Strongly disagree</p>           |

Behavioral intention

|                                                                                                                                                                                                                                                                                                                                                                       |                                                                                                                                                                                                                                                                                                                                                                           |
|-----------------------------------------------------------------------------------------------------------------------------------------------------------------------------------------------------------------------------------------------------------------------------------------------------------------------------------------------------------------------|---------------------------------------------------------------------------------------------------------------------------------------------------------------------------------------------------------------------------------------------------------------------------------------------------------------------------------------------------------------------------|
| <p>I intend to use collective intelligence technology for patient care as often as needed</p> <p><input type="radio"/> Strongly agree</p> <p><input type="radio"/> Agree</p> <p><input type="radio"/> Somewhat agree</p> <p><input type="radio"/> Neither agree nor disagree</p> <p><input type="radio"/> Somewhat disagree</p> <p><input type="radio"/> Disagree</p> | <p>Whenever possible, I intend not to use collective intelligence technology for patient care</p> <p><input type="radio"/> Strongly agree</p> <p><input type="radio"/> Agree</p> <p><input type="radio"/> Somewhat agree</p> <p><input type="radio"/> Neither agree nor disagree</p> <p><input type="radio"/> Somewhat disagree</p> <p><input type="radio"/> Disagree</p> |
|-----------------------------------------------------------------------------------------------------------------------------------------------------------------------------------------------------------------------------------------------------------------------------------------------------------------------------------------------------------------------|---------------------------------------------------------------------------------------------------------------------------------------------------------------------------------------------------------------------------------------------------------------------------------------------------------------------------------------------------------------------------|

Strongly disagree

Strongly disagree

To the extent possible, I would use collective intelligence technology in my patient care frequently

Strongly agree

Agree

Somewhat agree

Neither agree nor disagree

Somewhat disagree

Disagree

Strongly disagree
